# Supplementary material for: Sorption of hydrophilic dyes on anodic aluminium oxide films and application to pH sensing
Source: Royal Society of Chemistry journal article supplement (doi:10.1039/c4an00806e), 2014-11-19
Supplement: c4an00806e1.pdf [file c4an00806e1.pdf]

*Supplementary Material*

**Sorption of hydrophilic dyes on anodic aluminium  
oxide films and application to pH sensing**

Yuliya E. Silina,<sup>1</sup> Tatyana A. Kuchmenko,<sup>2</sup> Dietrich A. Volmer<sup>3\*</sup>

<sup>1</sup>*Leibniz Institute for New Materials (INM), Saarbrücken, Germany*

<sup>2</sup>*Voronezh State University of Engineering Technologies, Voronezh, Russia*

<sup>3</sup>*Institute of Bioanalytical Chemistry, Saarland University, Saarbrücken, Germany*

\*Corresponding author:

Prof. Dr. Dietrich A. Volmer  
Saarland University  
Institute of Bioanalytical Chemistry  
D-66123 Saarbrücken, Germany  
Tel +49 681 302 3433; Fax +49 681 302 2963  
Email: Dietrich.Volmer@mx.uni-saarland.de

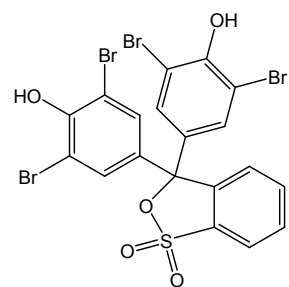

**BPB**

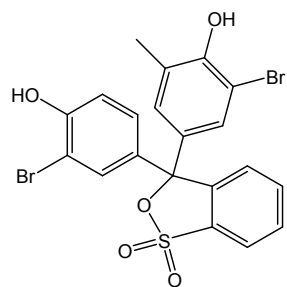

**BCP**

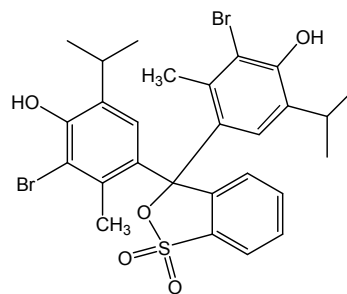

**BTB**

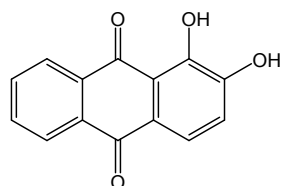

**AR**

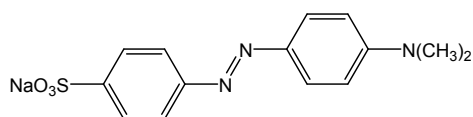

**MO**

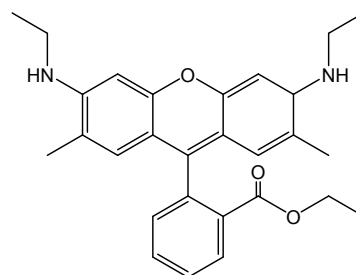

**R<sub>6</sub>G**

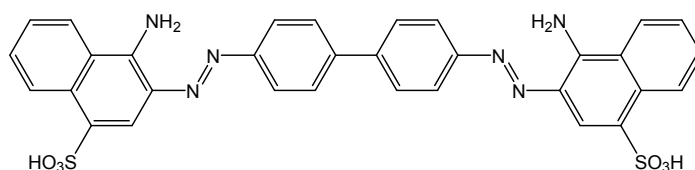

**CR**

**Figure S1.** Chemical structures of the investigated indicator dyes.

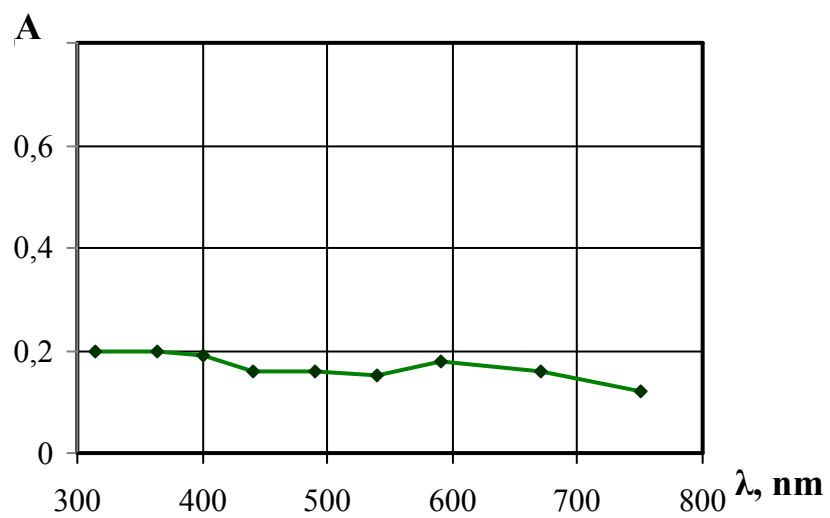

**Figure S2.** UV spectrum of bare AAO matrix produced from 0.6 M SSA.
